# Supplementary material for: Don’t dust off the dust! – A facile synthesis of graphene quantum dots derived from indoor dust towards their cytotoxicity and antibacterial activity
Source: Royal Society of Chemistry journal article supplement (doi:10.1039/d2nj02876j), 2022-01-01
Supplement: d2nj02876j1.pdf [file d2nj02876j1.pdf]

**Don't dust off the dust! - A facile synthesis of graphene quantum dots derived from indoor dust towards their cytotoxicity and antibacterial activity**

Liju Raju, Megha Sara Jacob and Eswaran Rajkumar\*

Department of Chemistry, Madras Christian College, Affiliated to the University of Madras  
Tambaram East, Chennai, Tamil Nadu, India

[rajjkumar@gmail.com](mailto:rajjkumar@gmail.com)

**Supplementary Figures**

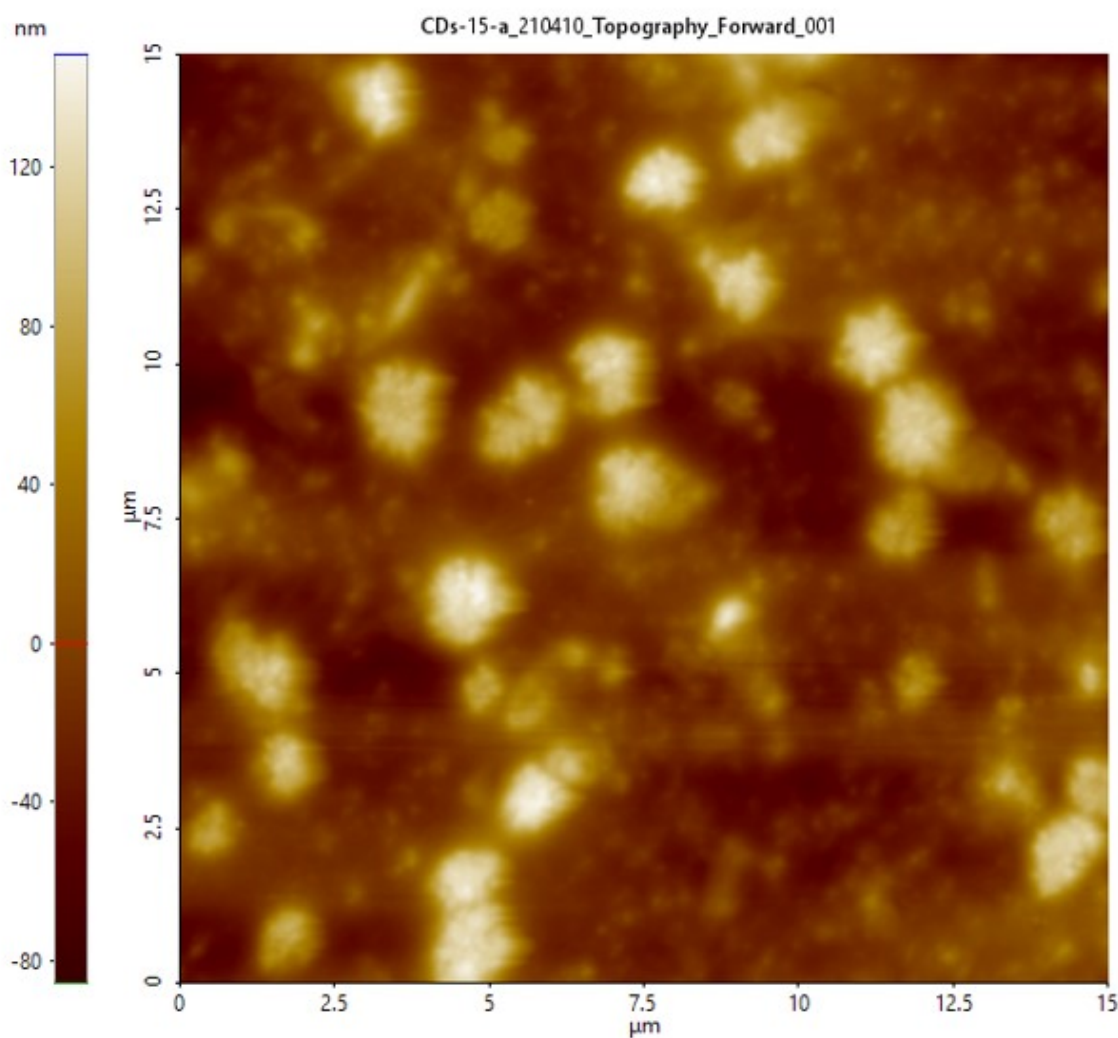

Figure S1 Atomic force microscopy image of GQDs

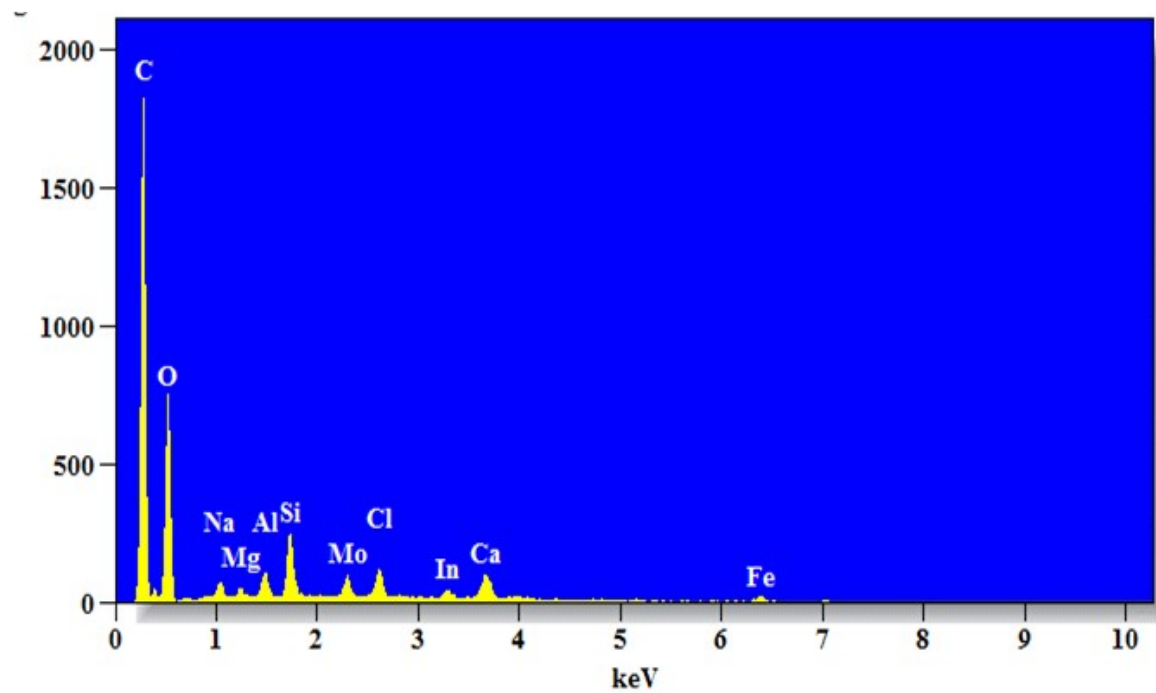

Figure S2 EDAX spectrum of the indoor dust particles

### **MCF-07 MTT Assay**

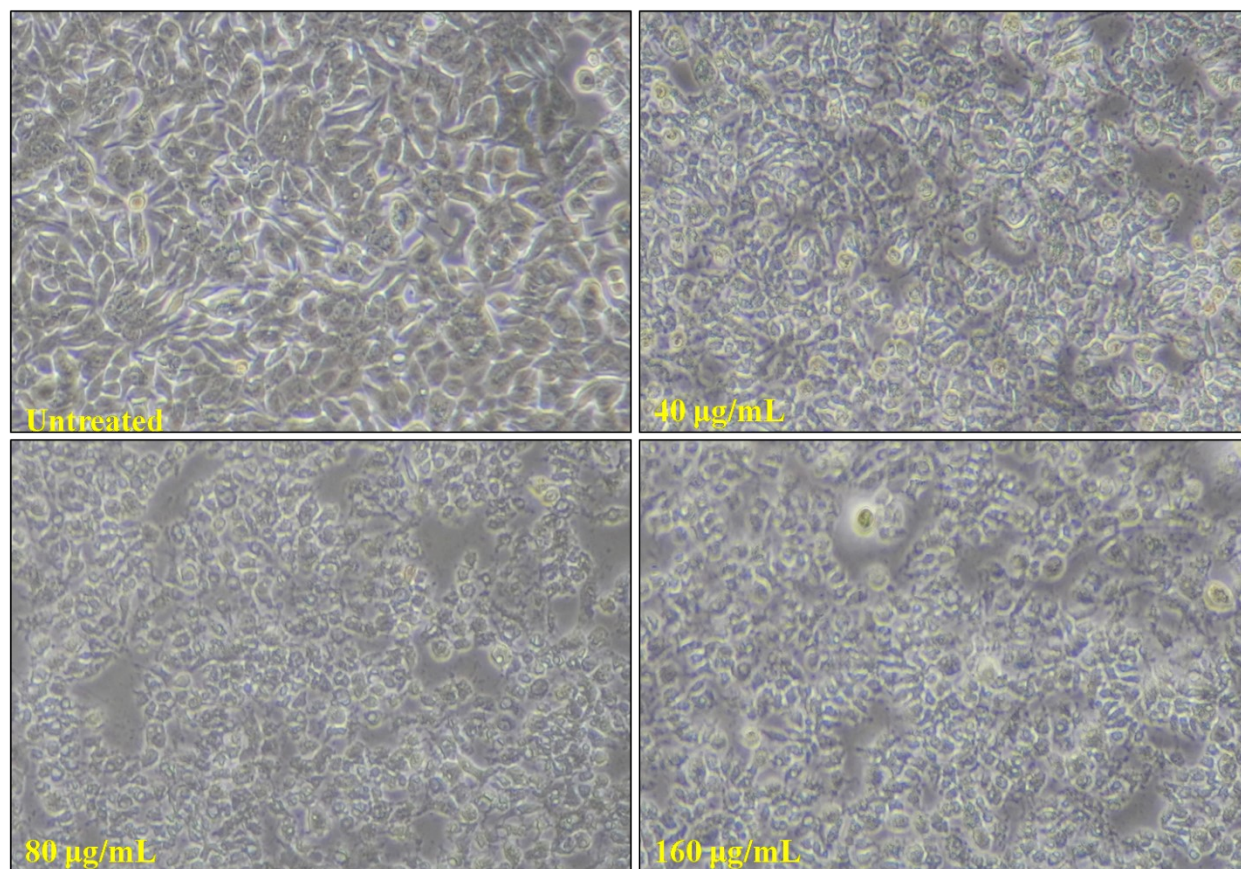

Figure S3 MTT assay phase contrast image of GQDs treated MDA-MB-231 cell line (20× magnification)



### MDA-MB 231 *MTT* Assay

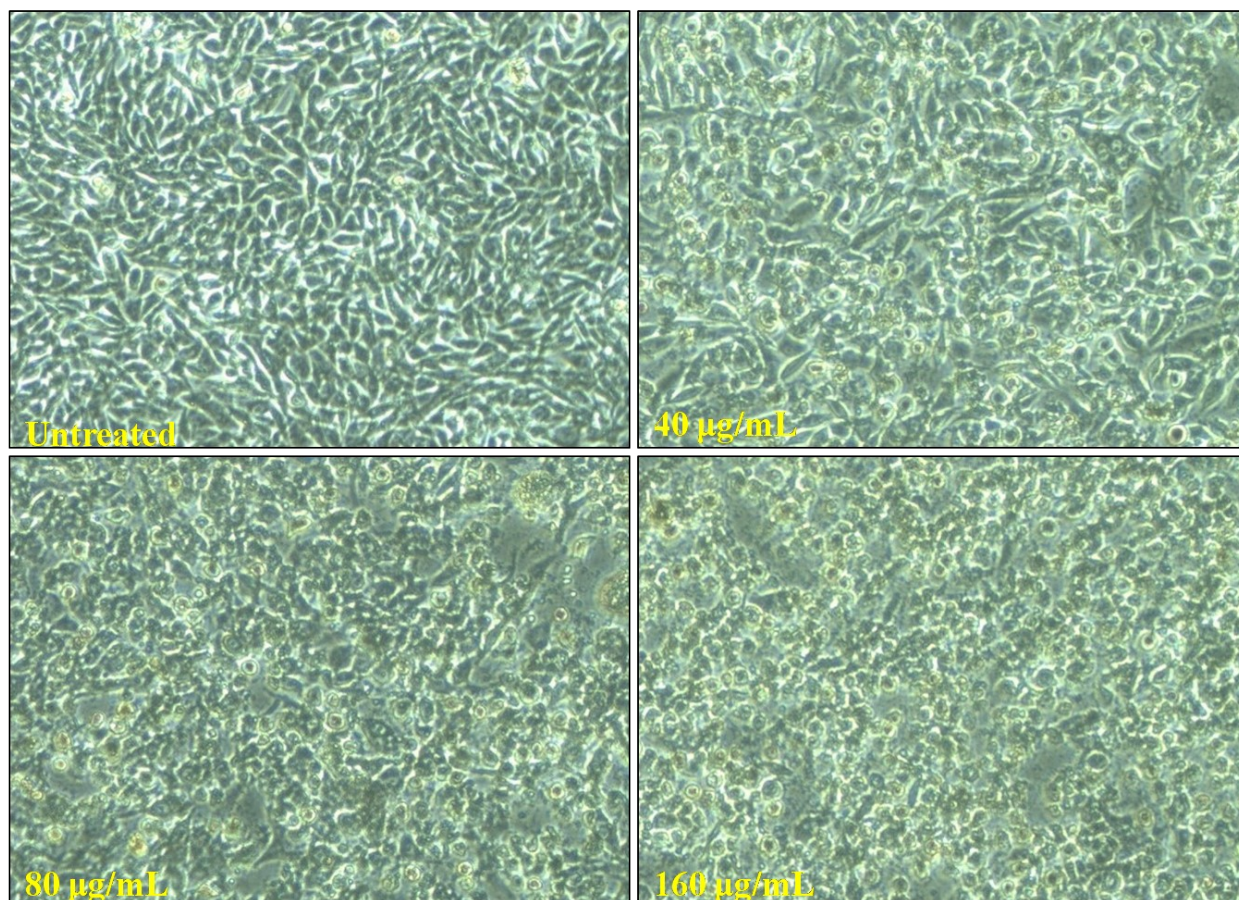

Figure S4 MTT assay phase contrast image of GQDs treated MCF-07 cell line (20× magnification)

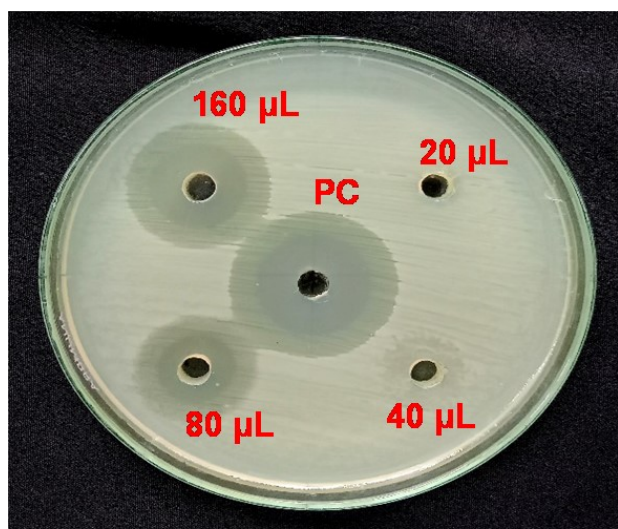

*Bacillus subtilis*

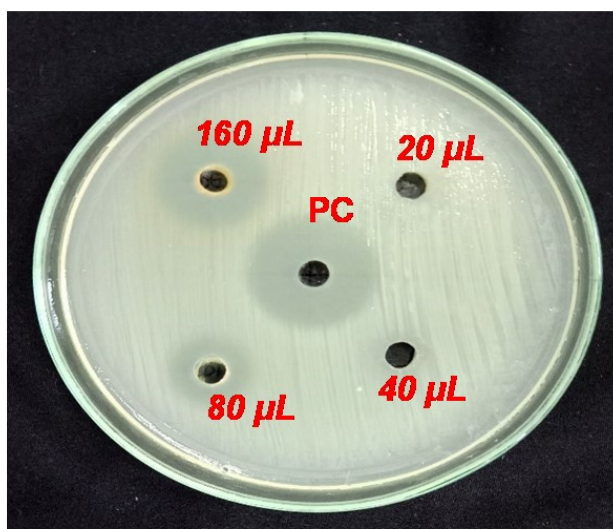

*Staphylococcus aureus*

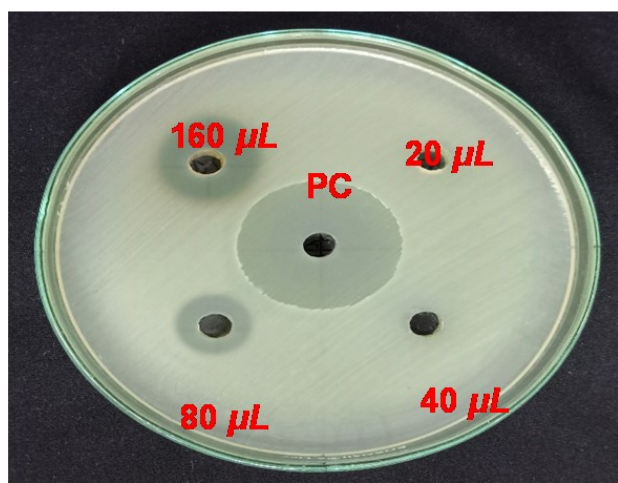

*Escherichia coli*

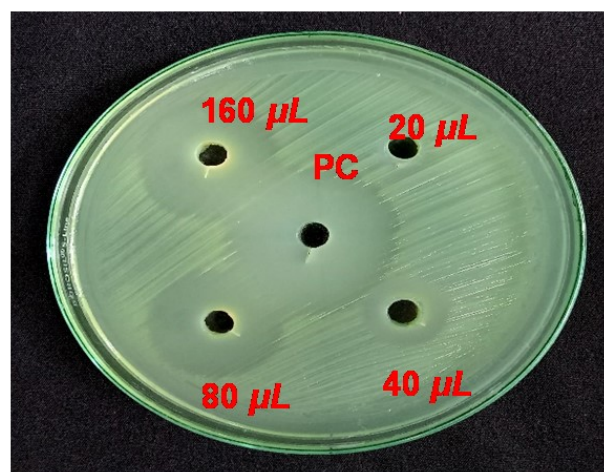

*Pseudomonas aeruginosa*

Figure S5 Antibacterial activity of GQDs against *Bacillus subtilis*, *Staphylococcus aureus*, *Escherichia coli* and *Pseudomonas aeruginosa*
